# Supplementary material
Source: ML conference proceedings conference paper supplement (https://www.ecva.net/papers/eccv_2020/papers_ECCV/html/123730273_ECCV_2020_paper.php)
Supplement: Supplementary file 3 [file 123730273-supp.zip]

Archive with 6 entries (5 files):
- da4ad_eccv2020_supp.pdf
- __MACOSX/
- __MACOSX/._da4ad_eccv2020_supp.pdf
- README
- da4ad_eccv2020_supp.mp4
- __MACOSX/._da4ad_eccv2020_supp.mp4
