# Supplementary material
Source: ML conference proceedings conference paper supplement (https://www.ecva.net/papers/eccv_2020/papers_ECCV/html/123730273_ECCV_2020_paper.php)
Supplement: Supplementary file 3 [file 123730273-supp.zip › README]

DA4AD: End-to-End Deep Attention-based Visual Localization for Autonomous Driving
ECCV 2020 Supplementary Material
Authors: Yao Zhou, Guowei Wan, Shenhua Hou, Li Yu, Gang Wang, Xiaofei Rui, and Shiyu Song

Contact songshiyu@baidu.com for further questions.

This supplementary material includes two files:
-- da4ad_eccv2020_supp.pdf: the supplementary material content
-- da4ad_eccv2020_supp.mp4: the demo video

The demo video can be played by common video players:
mpv: https://mpv.io/
vlc: https://www.videolan.org/vlc/index.html
